# Supplementary material for: Ultratrace detection of toxic heavy metal ions found in water bodies using hydroxyapatite supported nanocrystalline ZSM-5 modified electrodes
Source: Royal Society of Chemistry journal article supplement (doi:10.1039/c4nj02369b), 2015-01-01
Supplement: c4nj02369b1.pdf [file c4nj02369b1.pdf]

**Ultratrace detection of toxic heavy metal ions found in water bodies using  
hydroxyapatite supported nanocrystalline ZSM-5 modified electrodes**

Balwinder Kaur<sup>a</sup>, Rajendra Srivastava<sup>\*a</sup>, Biswarup Satpati<sup>b</sup>

**Supporting Information**

## **Synthesis of Materials**

In a typical synthesis of Nano-ZSM-5, 0.48 g sodium aluminate (53 wt.%  $\text{Al}_2\text{O}_3$ , 43 wt.%  $\text{Na}_2\text{O}$ ) was dissolved in 25 mL distilled water (Solution A). 2.13 g PrTES was mixed with 25 mL TPAOH (Solution B). Solution A and solution B were mixed, and the resultant solution was stirred for 15 minutes at room temperature, until it became a clear solution. 19.13 g TEOS was added into the resultant solution and stirring was continued for 6 h. The molar composition of the gel mixture was 90 TEOS/10 PrTES/2.5  $\text{Al}_2\text{O}_3$ /3.3  $\text{Na}_2\text{O}$ /25 TPAOH/2500  $\text{H}_2\text{O}$ . This mixture was transferred to a Teflon-lined autoclave, and hydrothermally treated at 443 K for 3 days under static conditions. The final product was filtered, washed with distilled water, and dried at 373 K. Material was calcined at 823 K for 6 h under flowing air. For comparison, conventional ZSM-5 was synthesized at 443 K using the same synthesis composition as mentioned above for Nano-ZSM-5, but without PrTES additive.

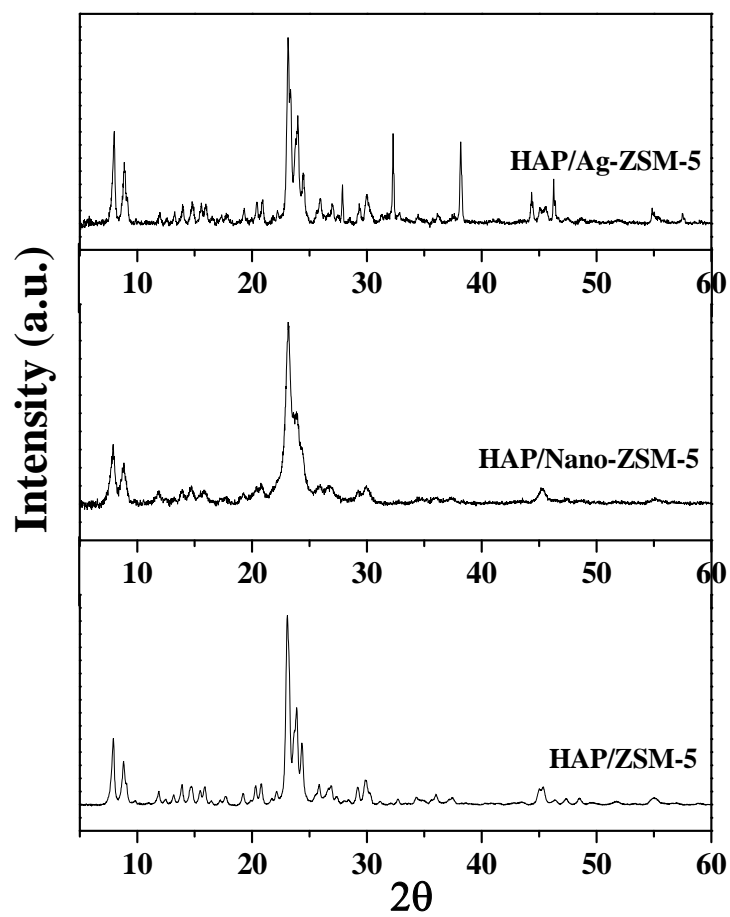

**Fig. S1.** XRD patterns of ZSM-5, Nano-ZSM-5, and Ag-ZSM-5 materials after immersion in SBF solution for 20 days.

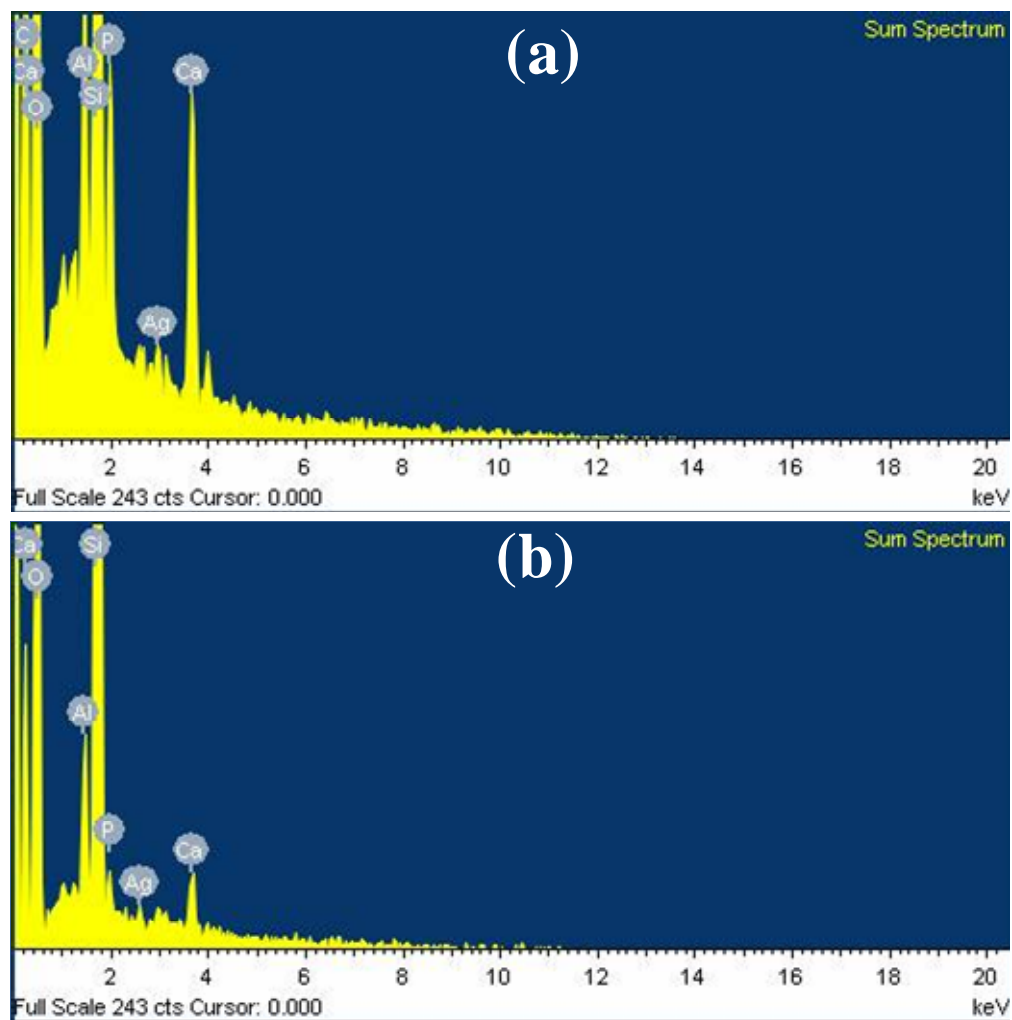

**Fig. S2.** EDX elemental maps of representative elements in (a) Ag-Nano-ZSM-5 and (b) Ag-ZSM-5 materials after immersion period of 20 days.

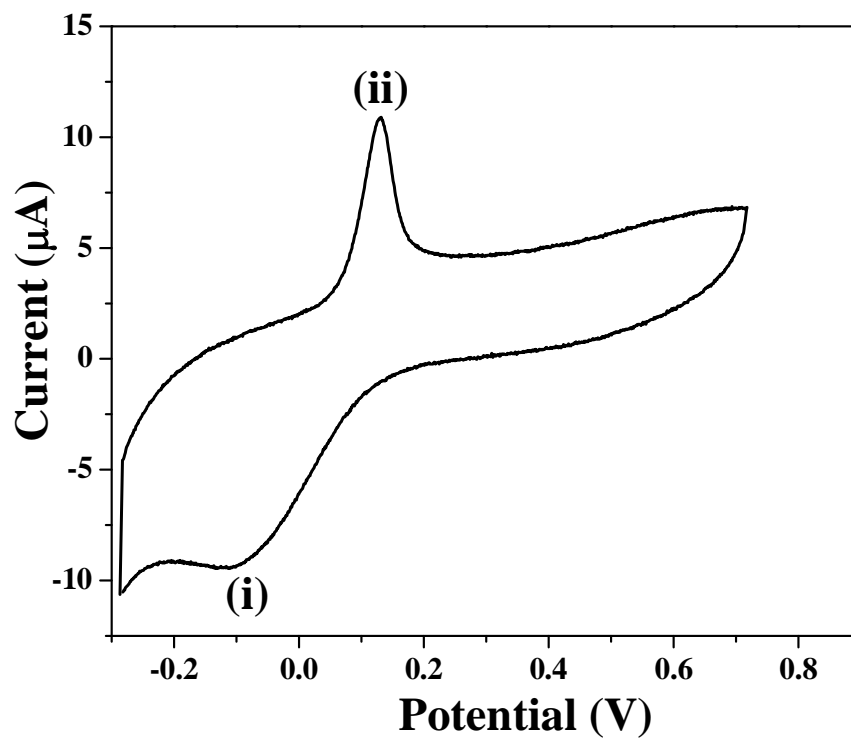

**Fig. S3.** CV at HAP/Ag-Nano-ZSM-5/GCE in the presence of  $\text{As}^{3+}$  (50 ppb) in 0.1 M PBS (pH 7) at a scan rate of 20 mV/s. The CV shows a reduction peak (i) at 0.08 V which corresponds to the reduction of  $\text{As}^{3+}$  to  $\text{As}^0$  and an oxidation peak (ii) at 0.150 which corresponds to the oxidation of  $\text{As}^{3+}$  to  $\text{As}^0$ .

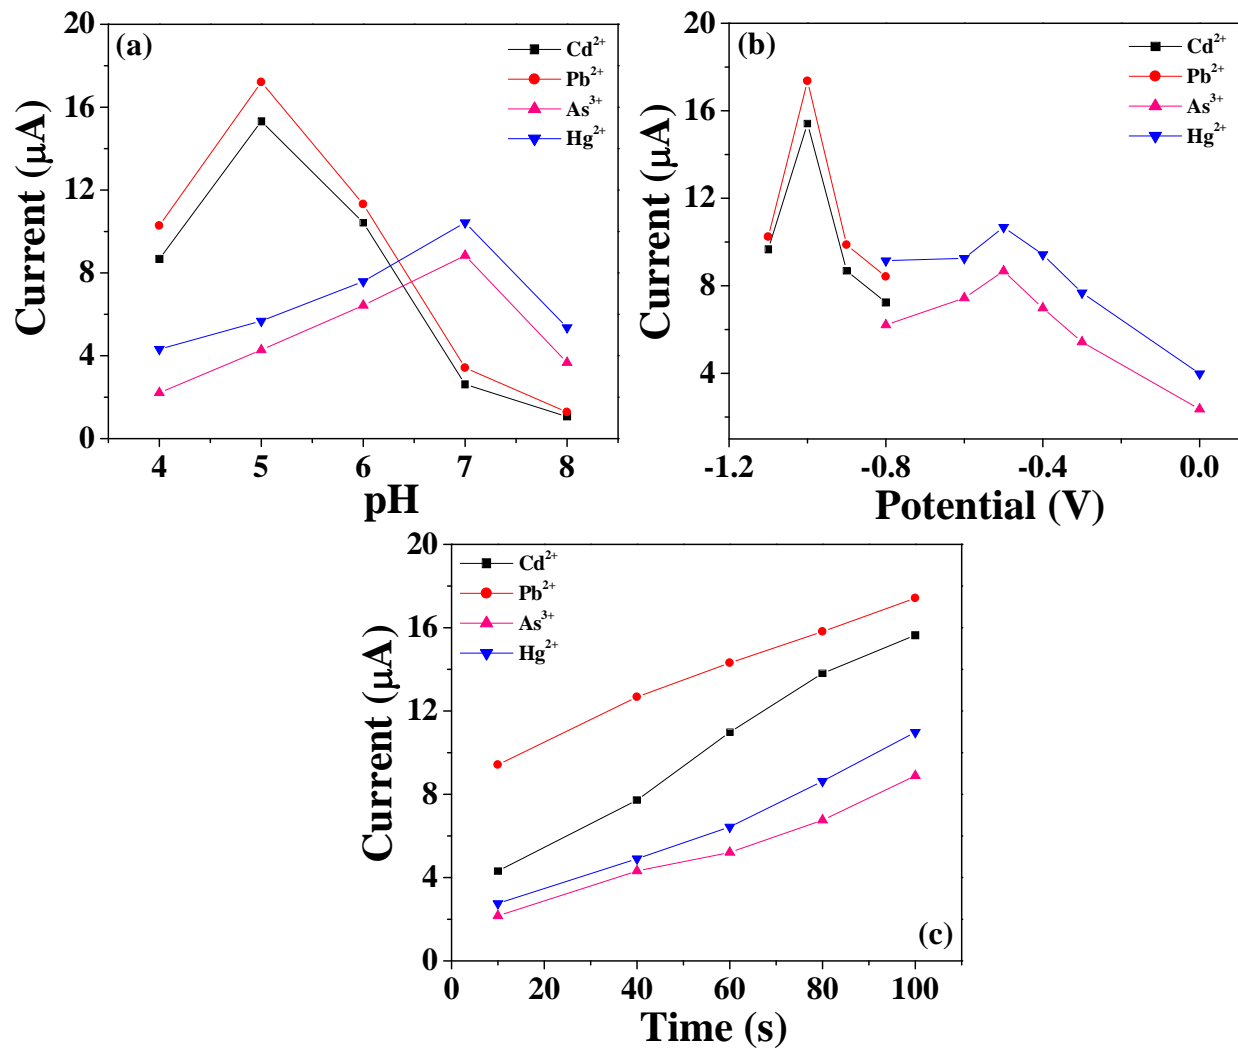

**Fig. S4.** Optimization of experimental conditions: Influence of (a) pH of supporting electrolyte, (b) deposition potential, and (c) deposition time on the stripping peak current response of HAP/Ag-Nano-ZSM-5/GCE in the presence of 50 ppb of each heavy metal ions ( $\text{Cd}^{2+}$ ,  $\text{Pb}^{2+}$ ,  $\text{As}^{3+}$ , and  $\text{Hg}^{2+}$ ) individually. SWSV parameters were selected as: Step potential 4 mV; square wave amplitude 25 mV; and square wave frequency 15 Hz.

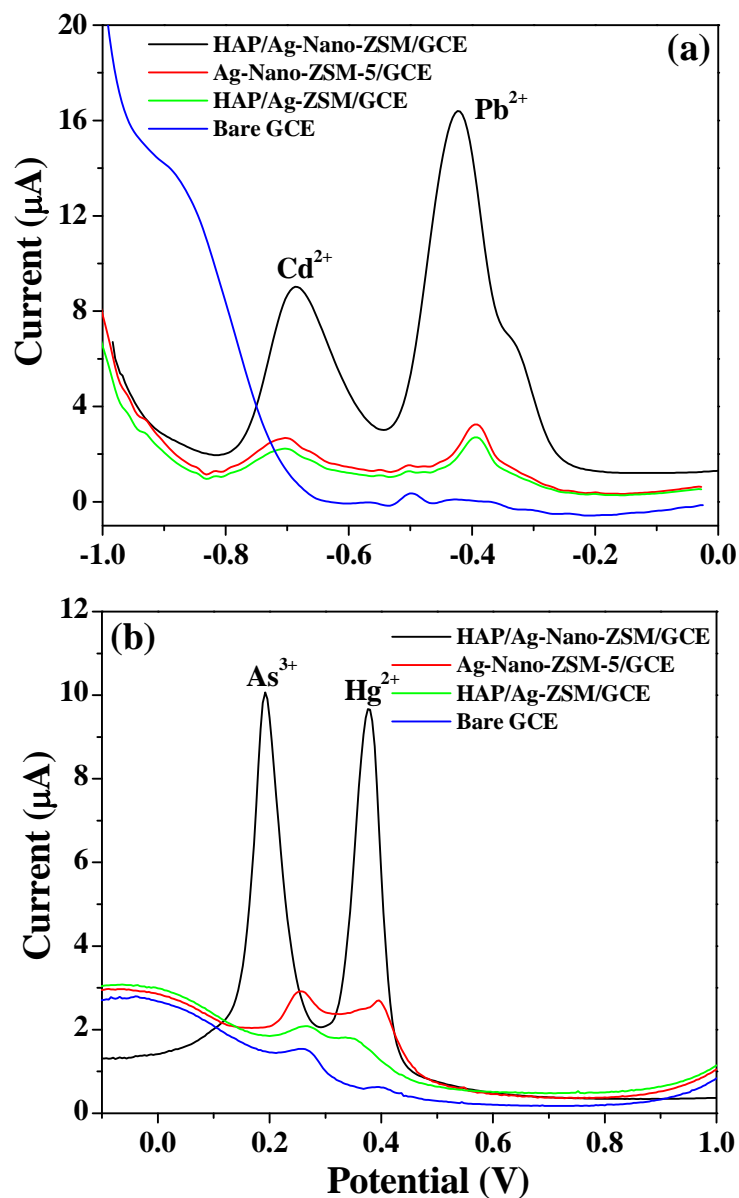

**Fig. S5.** Comparison of SWSV of 50 ppb each of (a) Cd<sup>2+</sup>, Pb<sup>2+</sup> in 0.1 M PBS (pH 5) at a deposition potential of -1 V and (b) As<sup>3+</sup>, Hg<sup>2+</sup> in 0.1 M PBS (pH 7) at a deposition potential of -0.5 V at different modified electrodes (HAP/Ag-Nano-ZSM-5/GCE, Ag-Nano-ZSM-5/GCE, HAP/Ag-ZSM-5/GCE ) and bare GCE. SWSV parameters were selected as: Step potential 4 mV; square wave amplitude 25 mV; square wave frequency 15 Hz and deposition time 100 s.

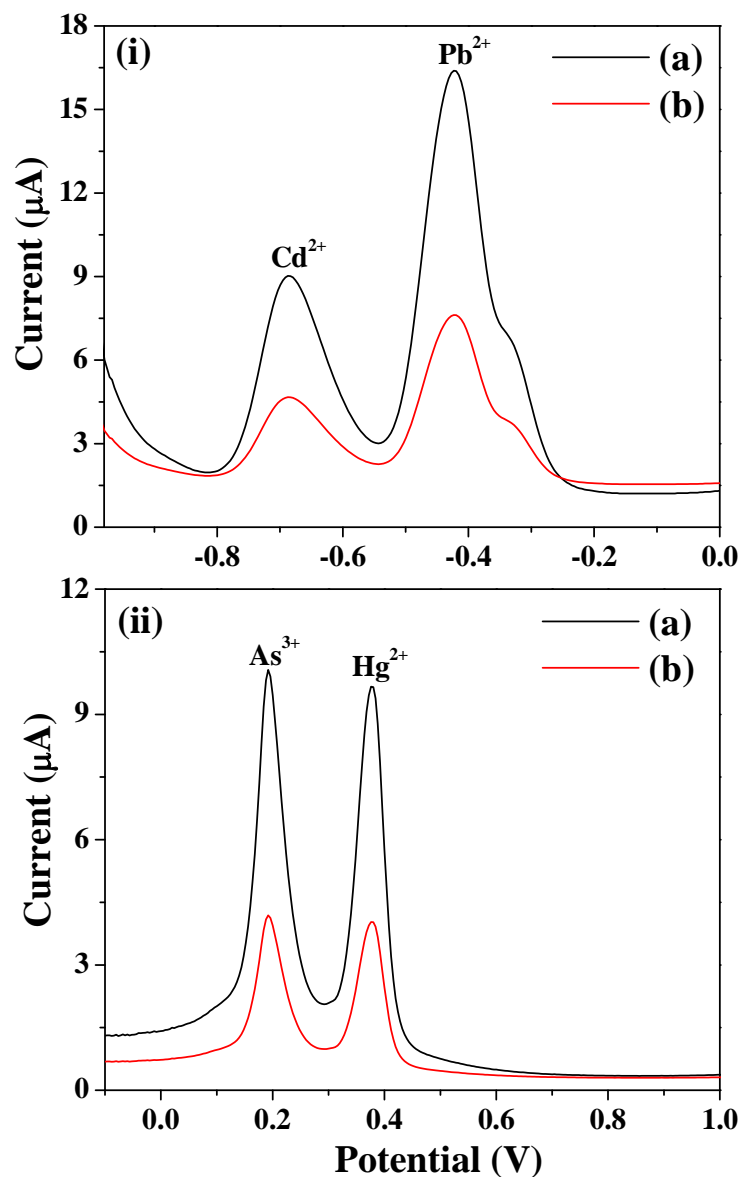

**Fig. S6.** Comparison of SWSV of 50 ppb each of (i) Cd<sup>2+</sup>, Pb<sup>2+</sup> in 0.1 M PBS (pH 5) at a deposition potential of -1 V and (ii) As<sup>3+</sup>, Hg<sup>2+</sup> in 0.1 M PBS (pH 7) at a deposition potential of -0.5 V at (a) HAP/Ag-Nano-ZSM-5/GCE and (b) physically mixed conventional HAP and Ag-Nano-ZSM-5 modified GCE. SWSV parameters were selected as: Step potential 4 mV; square wave amplitude 25 mV; square wave frequency 15 Hz and deposition time 100 s.



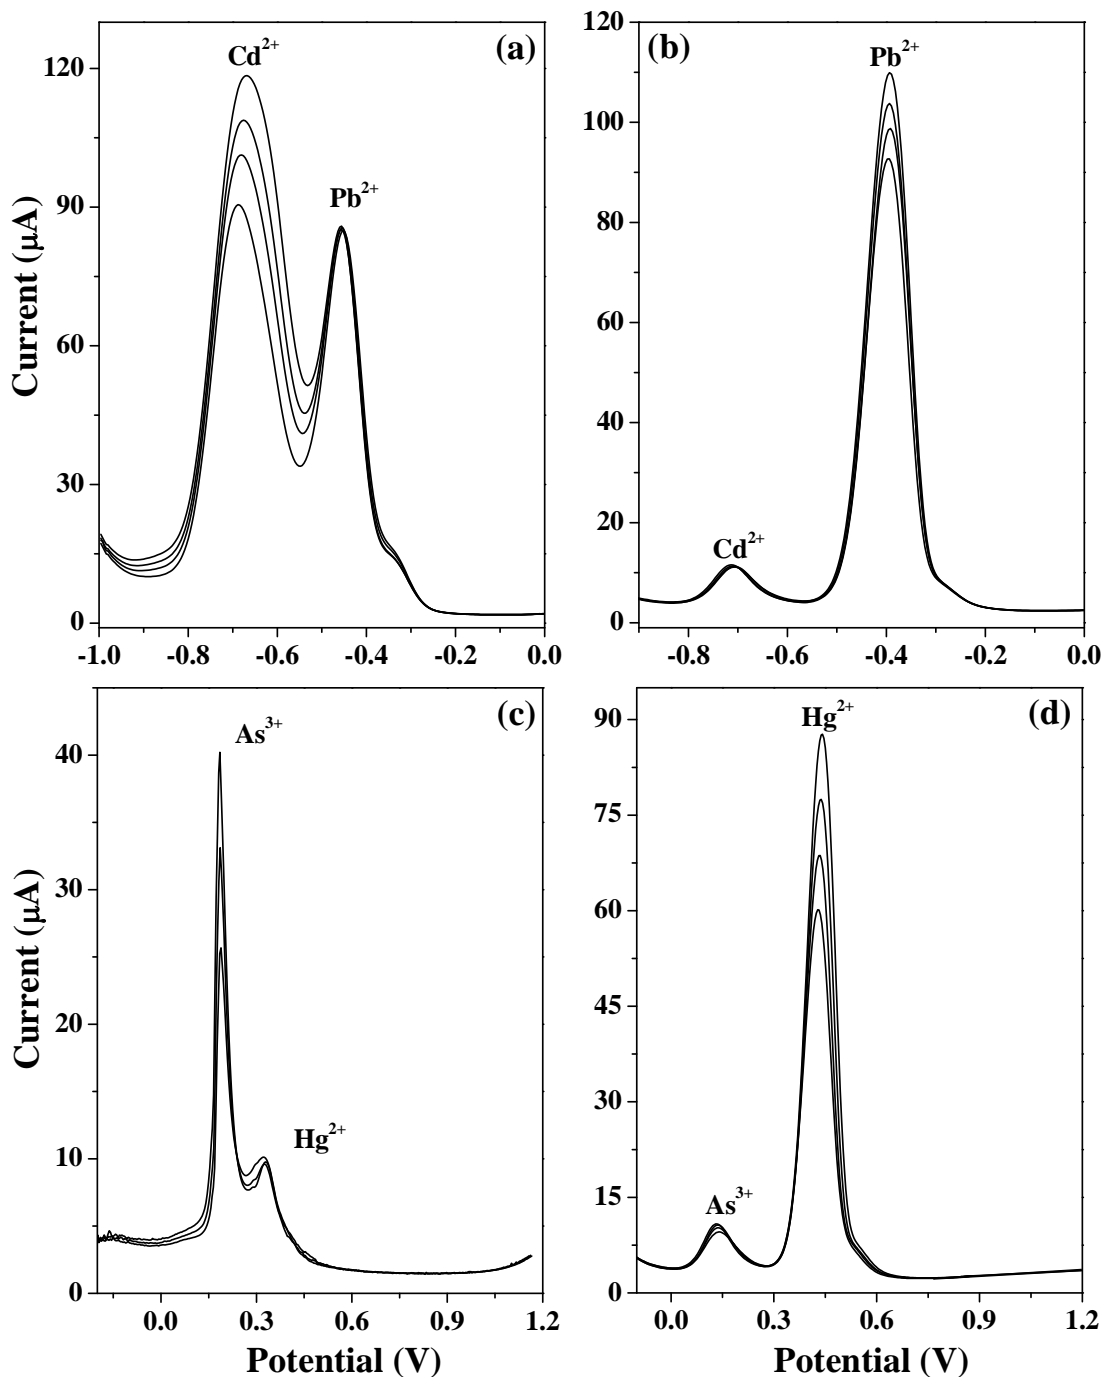

**Fig. S7.** Interference study: SWSV at HAP/Ag-Nano-ZSM-5/GCE by varying the concentration of one metal ion whereas that of second was kept constant under the optimized conditions. SWSV parameters were selected as: Step potential 4 mV; square wave amplitude 25 mV; square wave frequency 15 Hz and deposition time 100 s.

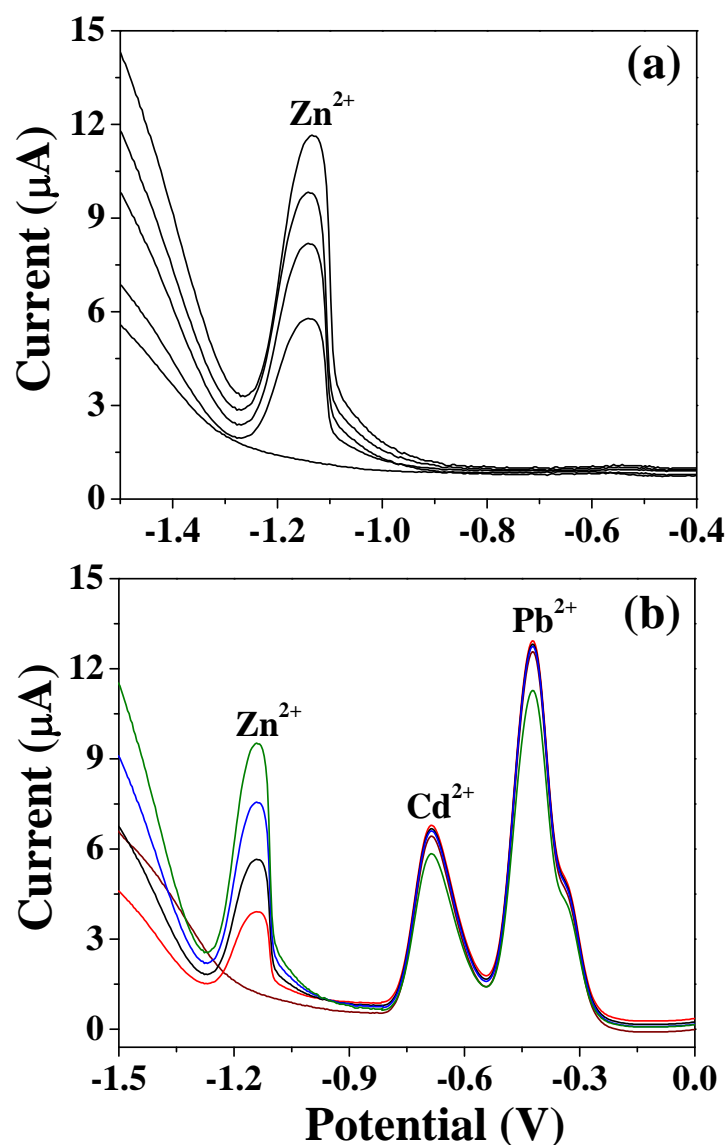

**Fig. S8.** SWSV response at HAP/Ag-Nano-ZSM-5/GCE for (a) individual analysis of  $\text{Zn}^{2+}$  with different concentrations (from inner to outer of curves 50, 200, 500, 800, 1000 ppb); and (b) interference study with varying concentrations of  $\text{Zn}^{2+}$  (from inner to outer of curves 50, 150, 200, 500, 800 ppb) in the presence of a fixed concentration (10 ppb) of  $\text{Cd}^{2+}$ ,  $\text{Pb}^{2+}$  in 0.1 M PBS (pH 5). SWSV parameters were selected as: Step potential 4 mV; square wave amplitude 25 mV; square wave frequency 15 Hz and deposition time 100 s.

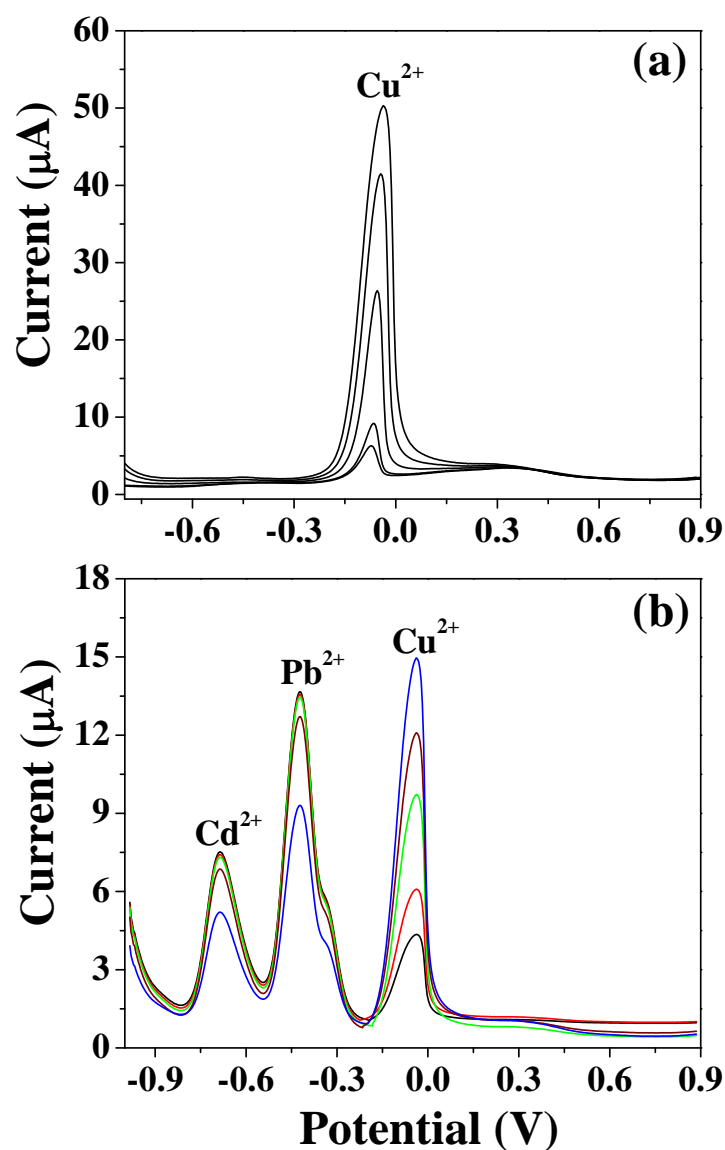

**Fig. S9.** SWSV response at HAP/Ag-Nano-ZSM-5/GCE for (a) individual analysis of  $\text{Cu}^{2+}$  with different concentrations (from inner to outer of curves 30, 50, 500, 1000, 1500 ppb); and (b) interference study with varying concentrations of  $\text{Cu}^{2+}$  (from inner to outer of curves 10, 30, 50, 100, 200 ppb) in the presence of a fixed concentration (10 ppb) of  $\text{Cd}^{2+}$ ,  $\text{Pb}^{2+}$  in 0.1 M PBS (pH 5). SWSV parameters were selected as: Step potential 4 mV; square wave amplitude 25 mV; square wave frequency 15 Hz and deposition time 100 s.

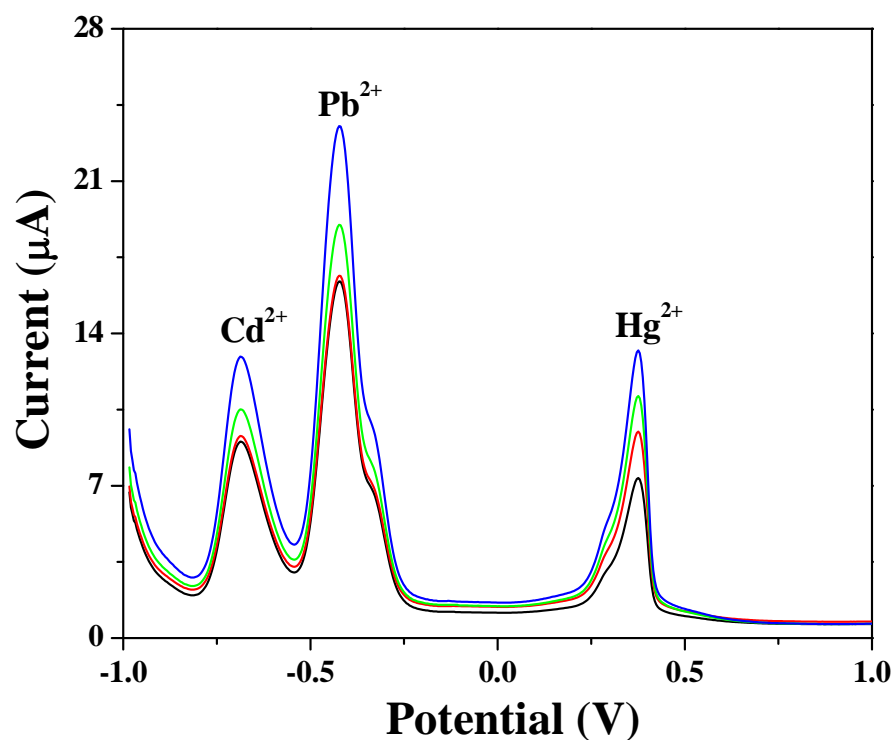

**Fig. S10.** SWSV response at HAP/Ag-Nano-ZSM-5/GCE for the interference study with varying concentrations of  $\text{Hg}^{2+}$  (from inner to outer of curves 2, 10, 50, 100 ppb) in the presence of a fixed concentration (10 ppb) of  $\text{Cd}^{2+}$ ,  $\text{Pb}^{2+}$  in 0.1 M PBS (pH 5). SWSV parameters were selected as: Step potential 4 mV; square wave amplitude 25 mV; square wave frequency 15 Hz and deposition time 100 s.

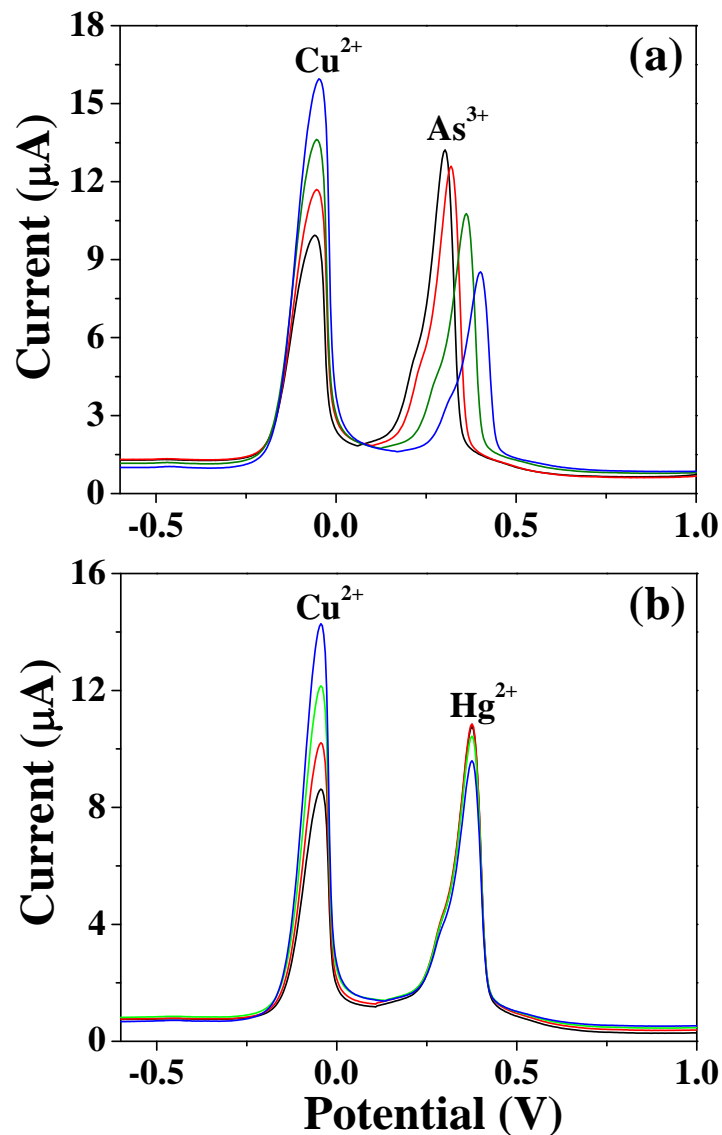

**Fig. S11.** SWSV response at HAP/Ag-Nano-ZSM-5/GCE in 0.1 M PBS (pH 7) for the interference study (a) with varying concentrations of  $\text{Cu}^{2+}$  (from inner to outer of curves 50, 100, 200, 500 ppb) in the presence of a fixed concentration (10 ppb) of  $\text{As}^{3+}$  and (b) with varying concentrations of  $\text{Cu}^{2+}$  (from inner to outer of curves 30, 50, 100, 150 ppb) in the presence of a fixed concentration (10 ppb) of  $\text{Hg}^{2+}$ . SWSV parameters were selected as: Step potential 4 mV; square wave amplitude 25 mV; square wave frequency 15 Hz and deposition time 100 s.

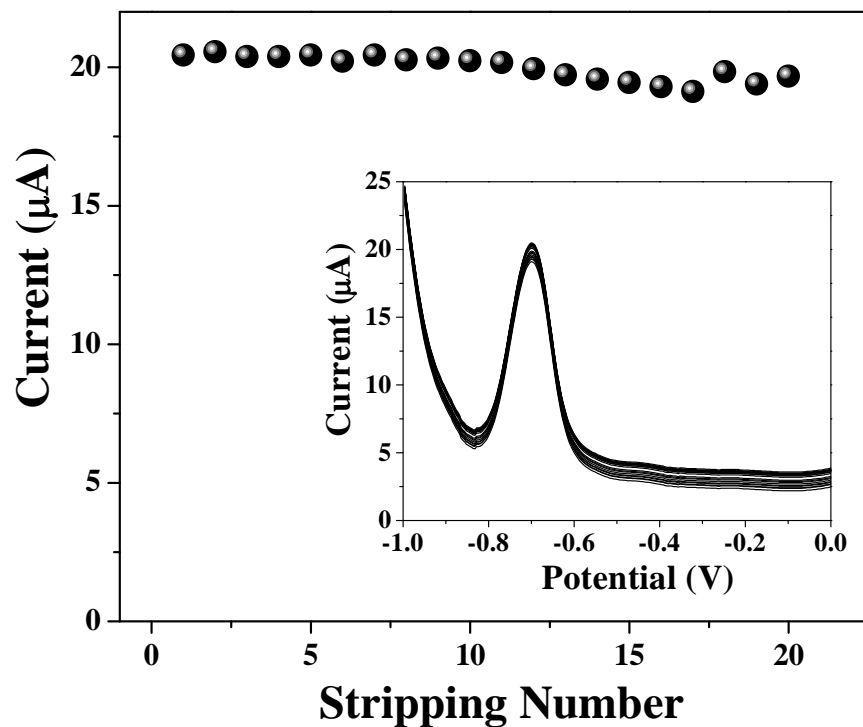

**Fig. S12.** The stability response for 20 times repetitive SWSV measurements in the presence of 50 ppb  $\text{Cd}^{2+}$ . Inset shows corresponding SWSV response at HAP/Ag-Nano-ZSM-5/GCE in the presence of 50 ppb  $\text{Cd}^{2+}$  in 0.1 M PBS (pH 5). SWSV parameters were selected as: Step potential 4 mV; square wave amplitude 25 mV; square wave frequency 15 Hz and deposition time 100 s.

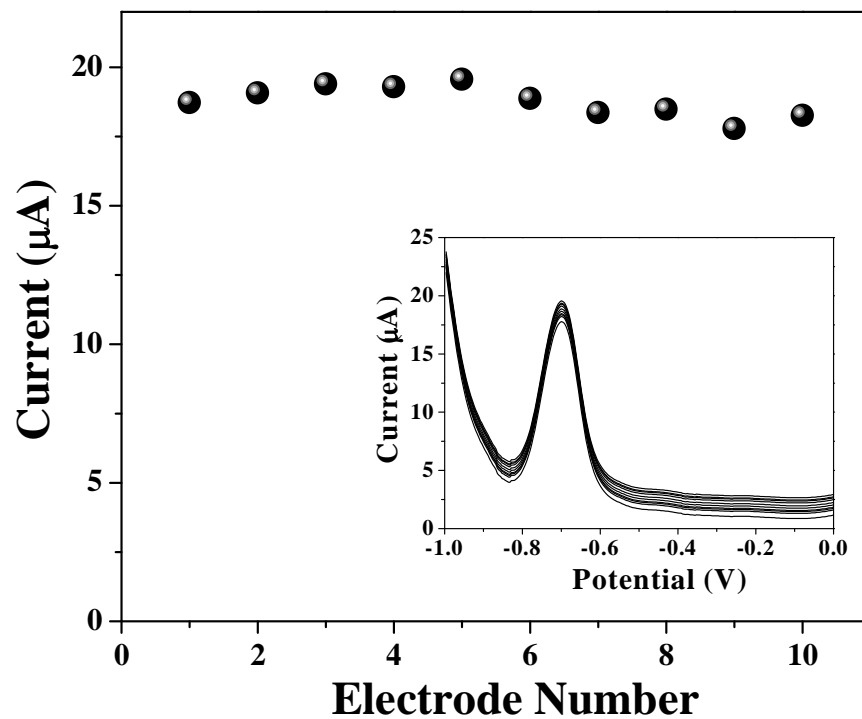

**Fig. S13.** The current response at different HAP/Ag-Nano-ZSM-5/GCEs (n=10) in the presence of 50 ppb  $\text{Cd}^{2+}$ . Inset shows corresponding SWSV response at 10 different HAP/Ag-Nano-ZSM-5/GCEs in the presence of 50 ppb  $\text{Cd}^{2+}$  in 0.1 M PBS (pH 5). SWSV parameters were selected as: Step potential 4 mV; square wave amplitude 25 mV; square wave frequency 15 Hz and deposition time 100 s.

**Table S1.** Ionic compositions (mM) of SBF.

| <b>Ion</b> | <b>Na<sup>+</sup></b> | <b>K<sup>+</sup></b> | <b>Mg<sup>2+</sup></b> | <b>Ca<sup>2+</sup></b> | <b>Cl<sup>-</sup></b> | <b>HCO<sup>3-</sup></b> | <b>HPO<sub>4</sub><sup>2-</sup></b> | <b>SO<sub>4</sub><sup>2-</sup></b> |
|------------|-----------------------|----------------------|------------------------|------------------------|-----------------------|-------------------------|-------------------------------------|------------------------------------|
| <b>SBF</b> | 142.0                 | 5.0                  | 1.5                    | 2.5                    | 147.8                 | 4.2                     | 1.0                                 | 0.5                                |



**Table S2.** Comparison of HAP/Ag-Nano-ZSM-5/GCE with other electrodes reported in the literature for heavy metal ion detection.

| S.No. | Modified electrode                                                  | Analyte                                                                      | Linear range                                                                         | Detection limit                          | Reference        |
|-------|---------------------------------------------------------------------|------------------------------------------------------------------------------|--------------------------------------------------------------------------------------|------------------------------------------|------------------|
| 1.    | AuNP–SWCNT film electrode                                           | Pb <sup>2+</sup>                                                             | 3.31 ppb - 22.29 ppb                                                                 | 0.546 ppb                                | [ <sup>1</sup> ] |
| 2.    | GC/NHAP/ionophore/Naf ion electrode                                 | Pb <sup>2+</sup>                                                             | 1.04 ppb - 166 ppb                                                                   | 0.2 ppb                                  | [ <sup>2</sup> ] |
| 3.    | AuNPs/GC electrode                                                  | Cd <sup>2+</sup><br>Pb <sup>2+</sup><br>Hg <sup>2+</sup>                     | -<br>-<br>-                                                                          | 3.4 ppm<br>6.2 ppm<br>6.0 ppm            | [ <sup>3</sup> ] |
| 4.    | SNACs/GCE                                                           | Cd <sup>2+</sup><br>Pb <sup>2+</sup><br>Hg <sup>2+</sup>                     | 10 ppb – 539.6 ppb<br>18.6 ppb – 1.2 ppm<br>18.0 ppb -198.6 ppm                      | 2.7 ppb<br>1.2 ppb<br>4.9 ppb            | [ <sup>4</sup> ] |
| 5.    | carbon nanoparticle-based SPEs                                      | Cd <sup>2+</sup><br>Pb <sup>2+</sup><br>Hg <sup>2+</sup>                     | 5 ppb - 100 ppb<br>5 ppb - 100 ppb<br>1 ppb - 10 ppb                                 | -<br>3 ppb<br>-                          | [ <sup>5</sup> ] |
| 6.    | γ-AlOOH@SiO <sub>2</sub> / Fe <sub>3</sub> O <sub>4</sub> electrode | Cd <sup>2+</sup><br>Pb <sup>2+</sup><br>Hg <sup>2+</sup>                     | 1.1 ppb – 15.7 ppb<br>0.4 ppb – 99.5 ppb<br>4 ppb – 56.2 ppb                         | -<br>-<br>-                              | [ <sup>6</sup> ] |
| 7.    | HAP/Ag-Nano-ZSM-5/GCE                                               | Cd <sup>2+</sup><br>Pb <sup>2+</sup><br>As <sup>3+</sup><br>Hg <sup>2+</sup> | 0.5 ppb - 1600 ppb<br>0.6 ppb - 1600 ppb<br>0.9 ppb - 1800 ppb<br>0.8 ppb - 1800 ppb | 0.1 ppb<br>0.1 ppb<br>0.2 ppb<br>0.2 ppb | This work        |

## References

1. M.-P. Ngoc Bui, C. A. Li, K. N. Han, X.-H. Pham and G. H. Seong, *Analyst*, 2012, **137**, 1888-1894.
2. D. Pan, Y. Wang, Z. Chen, T. Lou and W. Qin, *Anal. Chem.*, 2009, **81**, 5088-5094.
3. X. Xu, G. Duan, Y. Li, G. Liu, J. Wang, H. Zhang, Z. Dai and W. Cai, *ACS Appl. Mater. Interfaces*, 2013, **6**, 65-71.
4. R. Madhu, K. V. Sankar, S.-M. Chen and R. K. Selvan, *RSC Adv.*, 2014, **4**, 1225-1233.
5. G. Aragay, J. Pons and A. Merkoci, *J. Mater. Chem.*, 2011, **21**, 4326-4331.
6. Y. Wei, R. Yang, Y.-X. Zhang, L. Wang, J.-H. Liu and X.-J. Huang, *Chem. Commun.*, 2011, **47**, 11062-11064.
